# Supplementary material for: Molecular Dynamics Simulation on the Interfacial Behavior of Over-Molded Hybrid Fiber Reinforced Thermoplastic Composites
Source: PubMed Central journal article supplement (PMC7361982; doi:10.3390/polym12061270), 2020-06-02
Supplement: polymers-12-01270-s001.pdf [file polymers-12-01270-s001.pdf]

Supplementary Materials

# Molecular Dynamics Simulation on the Interfacial Behavior of Over-molded Hybrid Fiber Reinforced Thermoplastic Composites

Bingyan Jiang <sup>1,2</sup>, Muhan Zhang <sup>1</sup>, Liang Fu <sup>2</sup>, Mingyong Zhou <sup>2</sup> and Zhanyu Zhai <sup>1,2,\*</sup>

<sup>1</sup> State Key Laboratory of High Performance and Complex Manufacturing, Light Alloy Research Institute, Central South University, Lushan South Road 932, Changsha 410083, China; jby@csu.edu.cn (B.J.); 183811004@csu.edu.cn (Mu.Z.)

<sup>2</sup> College of Mechanical and Electrical Engineering, Central South University, Lushan South Road 932, 410083 Changsha, China; fuliangcsu@csu.edu.cn (L.F); zhou1989@csu.edu.cn (Mi.Z.)

\* Correspondence: zhanyuzhai@csu.edu.cn

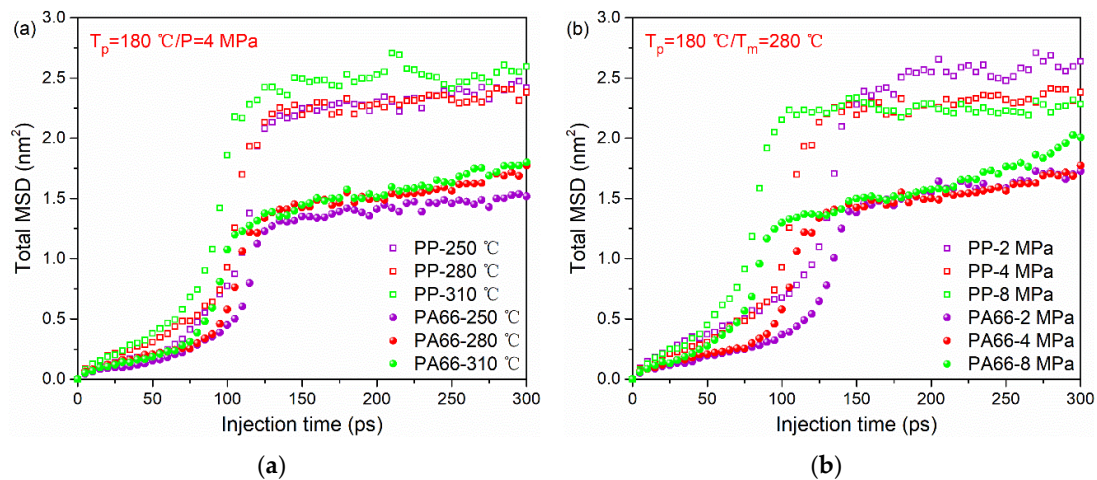

**Figure S1.** The MSD–time curve of PP and PA66 layer separately under various processing parameters: (a) melting temperatures and (b) injection pressure.

The MSD–time curves of PP and PA66 layers during simulations under various processing parameters are given in **Figure S1**. As seen, the fluctuation trend of the curves of the two materials is basically consistent with the general trend of the whole system (**Figure 6** in the Article). The motions of PP molecules are significantly stronger than that of PA66 molecules due to their shorter chain length and lower stiffness.

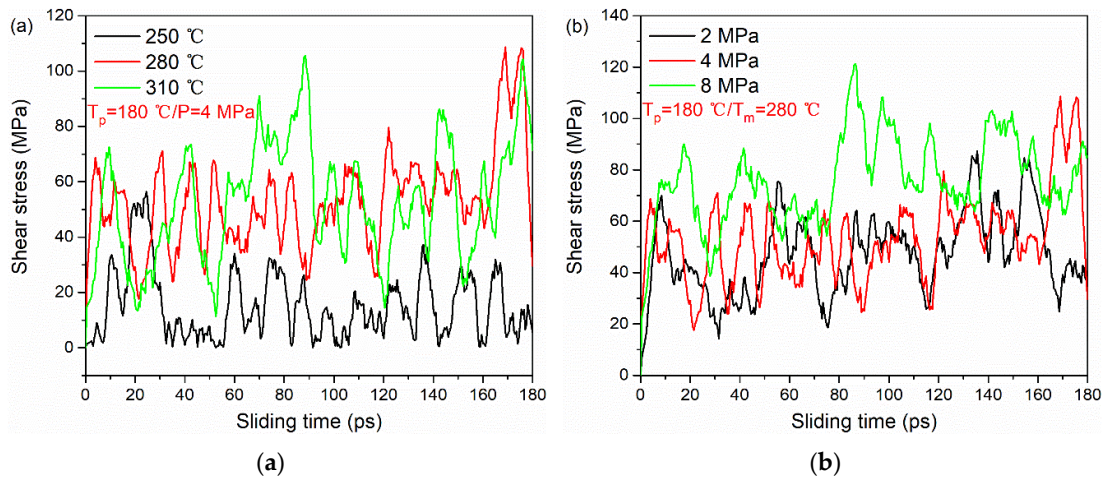

**Figure S2.** Shear stress versus sliding time curves for PA66–PP interface under various processing parameters: (a) melting temperatures and (b) injection pressure.

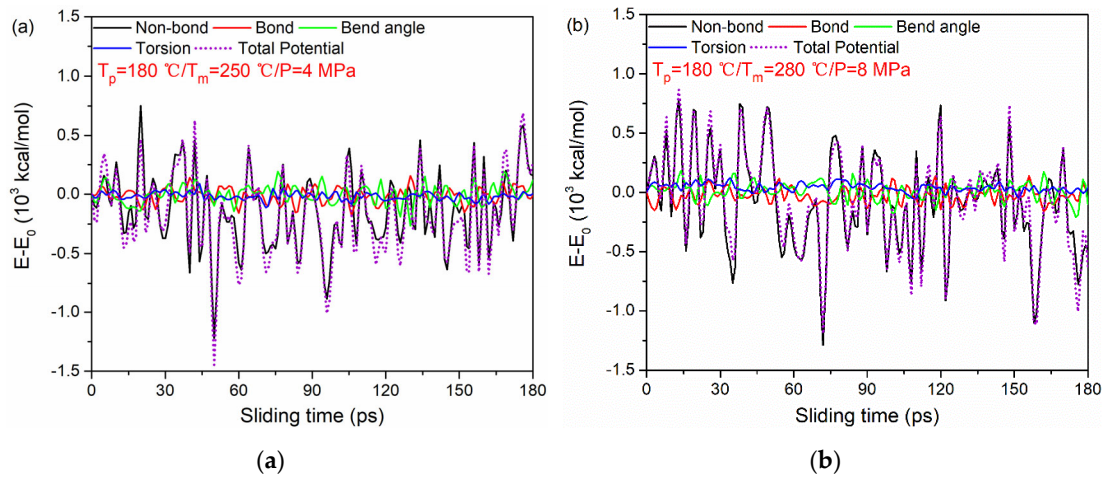

**Figure S3.** Potential energy decompositions of sliding deformation process for PA66–PP interface under processing parameters: (a)  $T_p=180\text{ °C}$ ,  $T_m=250\text{ °C}$ ,  $P=4\text{ MPa}$  and (b)  $T_p=180\text{ °C}$ ,  $T_m=280\text{ °C}$ ,  $P=8\text{ MPa}$ .
